# Supplementary material for: Microglial clearance of Alzheimer's amyloid-beta obstructed by nanoplastics
Source: Royal Society of Chemistry journal article supplement (doi:10.1039/d5en00291e), 2025-01-01
Supplement: d5en00291e2.xlsx [file d5en00291e2.xlsx]

## Sheet: Figure 1C
Monomers	Aβ	Aβ+ PS
	86279.1	49495.8
	73956.4	64536.7
	71081.6	56669.9
Oligomers	Aβ	Aβ+ PS
	50231.5	70166.3
	56083.9	75797.5
	50626.4	76246.4
fibrils	Aβ	Aβ+ PS
	56630.4	65020.4
	81518.3	86797.4
	84803.7	94387.9

## Sheet: Figure 2B
Control	PS (0.1 mg/mL)	PS (0.2 mg/mL)	PS (0.4 mg/mL)	Aβ	Aβ + PS (0.1 mg/mL)	Aβ + PS (0.2 mg/mL)	Aβ + PS (0.4 mg/mL)
17.3	18.8	36.1	37.3	17732	12388	9849	8583
17.7	19.2	36.4	34.8	17585	12755	9890	8476
17.5	18.8	44.1	35.5	17585	12649	9726	8583

## Sheet: Figure 2D
Control	PS (0.4 mg/mL)	Aβ (25 μM)	Aβ (25 μM) + PS (0.4 mg/mL)
8583	4810000	8277	5380000
9690	4520000	9968	4840000
9382	4560000	4218	5110000

## Sheet: Figure 2E
Control	PS	PS + MDC	PS + EIPA	PS + MβCD
5.66	29.1	30.3	19.6	18.1
5.51	26.2	26.4	21	19.4
5.46	24.8	27.3	20.3	18.1

## Sheet: Figure 2F
Control	Aβ	Aβ + MDC	Aβ + EIPA	Aβ + MβCD
0	83.4	85	69.8	88.7
0.016	84.4	83.7	70.1	85.3
0	85.9	83.8	70.7	86.1

## Sheet: Figure 2H
Control	MβCD (5 mM)	EIPA (30 μM)	MDC (10 μM)
93.36	94.86	92.78	89.82
86.5	87.07	91.35	88.46
87.34	86.18	92.57	87.69

## Sheet: Figure 3B
Control	PS (0.1 mg/mL)	PS (0.2 mg/mL)	PS (0.4 mg/mL)	Aβ (25 μM)	Aβ (25 μM) + PS (0.1 mg/mL)	Aβ (25 μM) + PS (0.2 mg/mL)	Aβ (25 μM) + PS (0.4 mg/mL)
4534	4676	4406	4528	3541	3514	2824	2176
4362	4516	4439	4483	3480	3471	2803	2187
4079	4472	4406	4472	3523	3270	2845	2641

## Sheet: Figure 3E
Control	PS	Aβ	Aβ + PS
0.903635	0.898407	0.697819	0.498766
1.02348	0.946979	0.873792	0.620186
1.07289	0.951591	0.694433	0.441041

## Sheet: Figure 3F
	Control			PS			Aβ			Aβ + PS
INOS	0.922295	0.995367	1.08922	1.49827	1.39794	1.57276	1.85742	1.40766	1.70917	2.0467	2.23969	2.30266
TNF	1.08425	0.990824	0.930901	2.1634	2.35104	2.41714	1.94976	1.65095	1.88335	3.37129	4.06513	3.95396
IL-10	1.02811	0.959264	1.00696	0.926588	0.823591	0.82932	0.742262	0.779165	0.790041	0.392292	0.486327	0.432269
Arg-1	0.972655	0.993092	1.04247	1.04247	0.913831	0.90125	0.806642	0.80107	0.482968	0.417544	0.586417	0.558644

## Sheet: Figure 3H
Control	PS (0.4 mg/mL)	Aβ (25 μM)	Aβ (25 μM) + PS (0.4 mg/mL)	Positive control
787	1117	1235	1370	3731
784	1201	1172	1316	3674
745	1212	1151	1265	3697

[truncated: 10 more sheets: Figure 3I, Figure 4A, Figure 4D, Figure 4E, Figure S1A, Sheet1, Sheet2, Figure S3E, Figure S7, Figure S9]
